# Supplementary material for: Primaquine radical cure of Plasmodium vivax: a critical review of the literature
Source: PubMed Central journal article supplement (PMC3489597; doi:10.1186/1475-2875-11-280), 2012-08-17
Supplement: 1475-2875-11-280-S3.pdf [file 1475-2875-11-280-S3.pdf]

### Additional File 3: Study References

| Authors             | Year | Title                                                                                                                                                               | Journal                                                                                 | Volume | Issue | Pages  | Reason for Exclusion    |
|---------------------|------|---------------------------------------------------------------------------------------------------------------------------------------------------------------------|-----------------------------------------------------------------------------------------|--------|-------|--------|-------------------------|
| Edgcomb et. al.     | 1950 | Primaquine, SN 13272, a new curative agent in vivax malaria; a preliminary report                                                                                   | Journal National Malaria Society                                                        | 9      | 4     | 285-92 | Full text not available |
| Alving et. al.      | 1953 | Korean vivax malaria. II. Curative treatment with pamaquine and primaquine                                                                                          | The American journal of tropical medicine and hygiene                                   | 2      | 6     | 970-6  |                         |
| Coatney et. al.     | 1953 | Korean vivax malaria. V. Cure of the infection by primaquine administered during long-term latency                                                                  | The American journal of tropical medicine and hygiene                                   | 2      | 6     | 985-8  |                         |
| Cooper et. al.      | 1953 | Studies in human malaria. XXXI. Comparison of primaquine, isopentaquine, SN-3883, and pamaquine as curative agents against Chesson strain vivax malaria             | The American journal of tropical medicine and hygiene                                   | 2      | 6     | 949-57 |                         |
| Di Lorenzo et. al.  | 1953 | Korean vivax malaria. IV. Curative effect of 15 milligrams of primaquine daily for 7 days                                                                           | The American journal of tropical medicine and hygiene                                   | 2      | 6     | 983-4  |                         |
| Singh et. al.       | 1953 | Preliminary studies on 8-aminoquinolines                                                                                                                            | Indian journal of malariology                                                           | 7      |       | 289-94 | Full text not available |
| Thaeler et. al.     | 1953 | A clinical study of primaquine (S. N. 13,272) in the treatment of malaria among the Miskito Indians of Nicaragua                                                    | The American journal of tropical medicine and hygiene                                   | 2      | 6     | 989-99 |                         |
| Singh et. al.       | 1954 | Antirelapse treatment with primaquine and pyrimethamine                                                                                                             | Indian journal of malariology                                                           | 8      | 2     | 127-36 | Full text not available |
| Alving et. al.      | 1955 | Potential of the curative action of primaquine in vivax malaria by quinine and chloroquine                                                                          | The Journal of laboratory and clinical medicine                                         | 46     | 2     | 301-6  |                         |
| Alving et. al.      | 1960 | Mitigation of the haemolytic effect of primaquine and enhancement of its action against exoerythrocytic forms of the Chesson strain of Plasmodium vivax by          | Bulletin of the World Health Organization                                               | 22     |       | 621-31 |                         |
| Basavaraj et. al.   | 1960 | Observations on the treatment of 678 malaria cases with primaquine in an area free from malaria transmission in Mysore State, India                                 | Indian journal of malariology                                                           | 14     |       | 269-81 |                         |
| Diwan et. al.       | 1962 | Primaquin Trials as Antirelapse (Radical) Treatment for Malaria conducted in National Malaria Eradication Programme Units (East) Meerut and Mathura (Uttar Pradesh) | Bulletin of the National Society of India for Malaria and Other Mosquito Borne Diseases | 10     | 2     | 91-102 | Full text not available |
| Mendoza et. al.     | 1963 | Comparative study of two regimens of radical treatment of vivax malaria in Mexico                                                                                   | WHO                                                                                     | 527.65 |       |        |                         |
| Martelo et. al.     | 1969 | Malaria in American soldiers                                                                                                                                        | Archives of internal medicine                                                           | 123    | 4     | 383-7  |                         |
| Fisher et. al.      | 1970 | Malaria in soldiers returning from Vietnam. Epidemiologic, therapeutic, and clinical studies                                                                        | The American journal of tropical medicine and hygiene                                   | 19     | 1     | 27-39  |                         |
| Charoenlarp et. al. | 1973 | Relapses of vivax malaria after a conventional course of primaquine and chloroquine: report of 2 cases                                                              | The Southeast Asian journal of tropical medicine and public health                      | 4      | 1     | 135-7  | Full text not available |
| Contacos et. al.    | 1973 | Five day primaquine therapy--an evaluation of radical curative activity against vivax malaria infection                                                             | The American journal of tropical medicine and hygiene                                   | 22     | 6     | 693-5  |                         |
| Sharma et. al.      | 1973 | Effectiveness of drug schedule being followed under the National Malaria Eradication Programme, India, for radical cure of vivax malaria cases.                     | Journal of Communicable Diseases                                                        | 5      |       | 167-74 |                         |
| Contacos et. al.    | 1974 | Combined chloroquine-primaquine therapy against vivax malaria                                                                                                       | The American journal of tropical medicine and hygiene                                   | 23     | 2     | 310-2  |                         |
| Kaplan et. al.      | 1974 | Improved therapy for Vietnam acquired vivax malaria                                                                                                                 | Military medicine                                                                       | 141    | 6     | 444-8  |                         |
| Miller et. al.      | 1974 | Sensitivity of four Central American strains of Plasmodium vivax to primaquine                                                                                      | The American journal of tropical medicine and hygiene                                   | 23     | 2     | 309-10 |                         |
| Clyde et. al.       | 1977 | Radical cure of Chesson strain vivax malaria in man by 7, not 14, days of treatment with primaquine                                                                 | The American journal of tropical medicine and hygiene                                   | 26     | 3     | 562-3  |                         |
| Roy et. al.         | 1977 | Efficacy of 5-day radical treatment of P. vivax infection in Tamil Nadu                                                                                             | The Indian journal of medical research                                                  | 65     | 5     | 652-6  |                         |
| Saint-Yves et. al.  | 1977 | Comparison of treatment schedules for Plasmodium vivax infections in the Solomon Islands                                                                            | Papua and New Guinea medical journal                                                    | 20     | 2     | 62-5   |                         |

### Additional File 3: Study References

| Authors                 | Year  | Title                                                                                                                                                   | Journal                                                                                                              | Volume | Issue | Pages   | Reason for Exclusion     |
|-------------------------|-------|---------------------------------------------------------------------------------------------------------------------------------------------------------|----------------------------------------------------------------------------------------------------------------------|--------|-------|---------|--------------------------|
| Cedillos et. al.        | 1978  | Field evaluation of primaquine in the control of Plasmodium vivax                                                                                       | The American journal of tropical medicine and hygiene                                                                | 27     | 3     | 466-72  |                          |
| Roy et. al.             | 1979  | Results of 5-day course of radical treatment of Plasmodium vivax in six districts of Tamil Nadu                                                         | The Indian journal of medical research                                                                               | 69     |       | 939-43  |                          |
| Kondrashin et. al.      | 1981  | Comparative studies on responses to 5-day treatment with primaquine of indigenous and imported cases of P. vivax in Nepal in 1974-76                    | Nepal Medical Association Journal                                                                                    | 19     |       | 06-015  | Full text not available  |
| Appavoo et. al.         | 1984  | Results of 3-day radical treatment of Plasmodium vivax in North Arcot and South Arcot Districts of Tamil Nadu                                           | Indian journal of malariology                                                                                        | 21     | 1     | 21-Apr  |                          |
| Lapierre et. al.        | 1984  | Drug resistance of Plasmodium falciparum and Plasmodium vivax strains in Cambodia (Cardamone Massif). Morphological characteristics of Plasmodium vivax | Medecine tropicale : revue du Corps de sante colonial                                                                | 44     | 4     | 339-49  | No translation available |
| Dixon et. al.           | 1985  | A clinical trial of mefloquine in the treatment of Plasmodium vivax malaria                                                                             | The American journal of tropical medicine and hygiene                                                                | 34     | 3     | 435-7   |                          |
| Harinasuta et. al.      | 1985  | Trials of mefloquine in vivax and of mefloquine plus 'fansidar' in falciparum malaria                                                                   | Lancet                                                                                                               | 1      | 8434  | 885-8   | Insufficient information |
| Ohtomo et. al.          | 1987  | Clinical evaluation of antimalarial regimens in Japan                                                                                                   | Zentralblatt fur Bakteriologie Mikrobiologie und Hygiene. Series A Medical microbiology infectious diseases virology | 264    | 3-Apr | 513-20  | No translation available |
| Rombo et. al.           | 1987  | Seven patients with relapses of Plasmodium vivax or P. ovale despite primaquine treatment                                                               | Tropical medicine and parasitology : official organ of Deutsche Tropenmedizinische Gesellschaft and of Deutsche      | 38     | 1     | 49-50   | No translation available |
| Arias et. al.           | 1989  | Low response of Colombian strains of Plasmodium vivax to classical antimalarial therapy                                                                 | Tropical medicine and parasitology : official organ of Deutsche Tropenmedizinische Gesellschaft and of Deutsche      | 40     | 1     | 21-Mar  | No translation available |
| Sinha et. al.           | 1989  | Efficacy of 5 day radical treatment of primaquine in Plasmodium vivax cases at the BHEL industrial complex, Hardwar (U.P.)                              | Indian journal of malariology                                                                                        | 26     | 2     | 83-6    |                          |
| Singh et. al.           | 1990  | Radical treatment of vivax malaria in Madhya Pradesh, India                                                                                             | Indian journal of malariology                                                                                        | 27     | 1     | 55-6    |                          |
| Tanabe et. al.          | 1990  | Clinical evaluation of antimalarial drugs                                                                                                               | Kansenshogaku zasshi. The Journal of the Japanese Association for Infectious Diseases                                | 64     | 6     | 668-73  | No translation available |
| Boulos et. al.          | 1991  | Frequency of malaria relapse due to Plasmodium vivax in a non-endemic region (Sao Paulo, Brazil)                                                        | Revista do Instituto de Medicina Tropical de Sao Paulo                                                               | 33     | 2     | 143-6   | No translation available |
| Prasad et. al.          | 1991  | Relapse/reinfection patterns of Plasmodium vivax infection: a four year study                                                                           | The Southeast Asian journal of tropical medicine and public health                                                   | 22     | 4     | 499-503 |                          |
| Ronn et. al.            | 1993  | Recurrence problems with preventive primaquine treatment in patients with malaria                                                                       | Ugeskrift for laeger                                                                                                 | 155    | 48    | 3901-4  | No translation available |
| Bunnag et. al.          | 1994  | High dose of primaquine in primaquine resistant vivax malaria                                                                                           | Transactions of the Royal Society of Tropical Medicine and Hygiene                                                   | 88     | 2     | 218-9   |                          |
| Pukrittayakamee et. al. | 1994a | Antimalarial effects of rifampin in Plasmodium vivax malaria                                                                                            | Antimicrobial agents and chemotherapy                                                                                | 38     | 3     | 511-4   |                          |
| Pukrittayakamee et. al. | 1994b | Blood stage antimalarial efficacy of primaquine in Plasmodium vivax malaria                                                                             | The Journal of infectious diseases                                                                                   | 169    | 4     | 932-5   |                          |
| Baird et. al.           | 1995  | Treatment of chloroquine-resistant Plasmodium vivax with chloroquine and primaquine or halofantrine                                                     | The Journal of infectious diseases                                                                                   | 171    | 6     | 1678-82 |                          |
| Jelinek et. al.         | 1995  | Long-term efficacy of primaquine in the treatment of vivax malaria in nonimmune travelers                                                               | The American journal of tropical medicine and hygiene                                                                | 52     | 4     | 322-4   |                          |
| Tan-ariya et. al.       | 1995  | Clinical response and susceptibility in vitro of Plasmodium vivax to the standard regimen of chloroquine in Thailand                                    | Transactions of the Royal Society of Tropical Medicine and Hygiene                                                   | 89     | 4     | 426-9   |                          |
| Phillips et. al.        | 1996  | Failure of combined chloroquine and high-dose primaquine therapy for Plasmodium vivax malaria acquired in Guyana, South America                         | Clinical infectious diseases : an official publication of the Infectious Diseases Society of America                 | 23     | 5     | 1171-3  | Case report              |
| Srivastava et. al.      | 1996  | Studies on Plasmodium vivax relapse pattern in Kheda district, Gujarat                                                                                  | Indian journal of malariology                                                                                        | 33     | 4     | 173-9   |                          |

### Additional File 3: Study References

| Authors                    | Year  | Title                                                                                                                                               | Journal                                                                                                          | Volume | Issue  | Pages   | Reason for Exclusion     |
|----------------------------|-------|-----------------------------------------------------------------------------------------------------------------------------------------------------|------------------------------------------------------------------------------------------------------------------|--------|--------|---------|--------------------------|
| Fryauff et. al.            | 1997  | Halofantrine and primaquine for radical cure of malaria in Irian Jaya, Indonesia                                                                    | Annals of tropical medicine and parasitology                                                                     | 91     | 1      | Jul-16  |                          |
| Smoak et. al.              | 1997  | Plasmodium vivax infections in U.S. Army troops: failure of primaquine to prevent relapse in studies from Somalia                                   | The American journal of tropical medicine and hygiene                                                            | 56     | 2      | 231-4   |                          |
| Gogtay et. al.             | 1998  | A 5 days primaquine regimen as anti-relapse therapy for Plasmodium vivax                                                                            | Transactions of the Royal Society of Tropical Medicine and Hygiene                                               | 92     | 3      | 341     |                          |
| Pinto et. al.              | 1998  | Clinical efficacy of four schemes for vivax malaria treatment in children                                                                           | Jornal de pediatria                                                                                              | 74     | 3      | 222-7   | No translation available |
| Soto et. al.               | 1998  | Primaquine prophylaxis against malaria in nonimmune Colombian soldiers: efficacy and toxicity. A randomized, double-blind, placebo-controlled trial | Annals of internal medicine                                                                                      | 129    | 3      | 241-4   |                          |
| Fang et. al.               | 1999  | Imported malaria: successful treatment of 31 patients in the era of chloroquine resistance                                                          | Journal of the Formosan Medical Association = Taiwan yi zhi                                                      | 98     | 10     | 683-7   |                          |
| Gogtay et. al.             | 1999  | Efficacies of 5- and 14-day primaquine regimens in the prevention of relapses in Plasmodium vivax infections                                        | Annals of tropical medicine and parasitology                                                                     | 93     | 8      | 809-12  |                          |
| Li et. al.                 | 1999  | Observation on efficacy of artemether compound against vivax malaria                                                                                | Zhongguo ji sheng chong xue yu ji sheng chong bing za zhi = Chinese journal of parasitology & parasitic diseases | 17     | 3      | 175-7   |                          |
| Looareesuwan et. al.       | 1999a | Chloroquine sensitivity of Plasmodium vivax in Thailand                                                                                             | Annals of tropical medicine and parasitology                                                                     | 93     | 3      | 225-30  |                          |
| Looareesuwan et. al.       | 1999b | Atovaquone and proguanil hydrochloride followed by primaquine for treatment of Plasmodium vivax malaria in Thailand                                 | Transactions of the Royal Society of Tropical Medicine and Hygiene                                               | 93     | 6      | 637-40  |                          |
| Luxemburger et. al.        | 1999  | Treatment of vivax malaria on the western border of Thailand                                                                                        | Transactions of the Royal Society of Tropical Medicine and Hygiene                                               | 93     | 4      | 433-8   |                          |
| Rowland et. al.            | 1999  | Randomized controlled trials of 5- and 14-days primaquine therapy against relapses of vivax malaria in an Afghan refugee settlement in Pakistan     | Transactions of the Royal Society of Tropical Medicine and Hygiene                                               | 93     | 6      | 641-3   |                          |
| Soto et. al.               | 1999  | Double-blind, randomized, placebo-controlled assessment of chloroquine/primaquine prophylaxis for malaria in nonimmune Colombian soldiers           | Clinical infectious diseases : an official publication of the Infectious Diseases Society of America             | 29     | 1      | 199-201 | Prophylaxis study        |
| Wilairatana et. al.        | 1999  | Efficacy of primaquine regimens for primaquine-resistant Plasmodium vivax malaria in Thailand                                                       | The American journal of tropical medicine and hygiene                                                            | 61     | 6      | 973-7   |                          |
| Bergonzoli et. al.         | 2000  | Therapeutic efficacy of different antimalarial regimens in the Costa Rica-Nicaragua border region                                                   | Revista panamericana de salud publica = Pan American journal of public health                                    | 7      | 6      | 366-70  |                          |
| Kitchener et. al.          | 2000  | Malaria in the Australian Defence Force during and after participation in the International Force in East Timor (INTERFET)                          | The Medical journal of Australia                                                                                 | 173    | 11-Dec | 583-5   | Prophylaxis study        |
| Pukrittayakamee et. al.    | 2000  | Therapeutic responses to different antimalarial drugs in vivax malaria                                                                              | Antimicrobial agents and chemotherapy                                                                            | 44     | 6      | 1680-5  |                          |
| Schwartz et. al.           | 2000  | Short report: a consideration of primaquine dose adjustment for radical cure of Plasmodium vivax malaria                                            | The American journal of tropical medicine and hygiene                                                            | 62     | 3      | 393-5   |                          |
| Singh et. al.              | 2000  | Emergence of chloroquine-resistant vivax malaria in south Bihar (India)                                                                             | Transactions of the Royal Society of Tropical Medicine and Hygiene                                               | 94     | 3      | 327     |                          |
| Villalobos-Salcedo et. al. | 2000  | In-vivo sensitivity of Plasmodium vivax isolates from Rondônia (western Amazon region, Brazil) to regimens including chloroquine and primaquine     | Annals of tropical medicine and parasitology                                                                     | 94     | 8      | 749-58  |                          |
| Abdon et. al.              | 2001  | Assessment of the response to reduced treatment schemes for vivax malaria                                                                           | Revista da Sociedade Brasileira de Medicina Tropical                                                             | 34     | 4      | 343-8   |                          |
| Adak et. al.               | 2001  | Plasmodium vivax polymorphism in a clinical drug trial                                                                                              | Clinical and diagnostic laboratory immunology                                                                    | 8      | 5      | 891-4   |                          |
| Buchachart et. al.         | 2001  | Effect of primaquine standard dose (15 mg/day for 14 days) in the treatment of vivax malaria patients in Thailand                                   | The Southeast Asian journal of tropical medicine and public health                                               | 32     | 4      | 720-6   |                          |
| Dua et. al.                | 2001  | Plasmodium vivax relapses after 5 days of primaquine treatment, in some industrial complexes of India                                               | Annals of tropical medicine and parasitology                                                                     | 95     | 7      | 655-9   |                          |

### Additional File 3: Study References

| Authors                 | Year | Title                                                                                                                                                             | Journal                                                                                                                | Volume | Issue | Pages    | Reason for Exclusion                 |
|-------------------------|------|-------------------------------------------------------------------------------------------------------------------------------------------------------------------|------------------------------------------------------------------------------------------------------------------------|--------|-------|----------|--------------------------------------|
| Duarte et. al.          | 2001 | Association of subtherapeutic dosages of a standard drug regimen with failures in preventing relapses of vivax malaria                                            | The American journal of tropical medicine and hygiene                                                                  | 65     | 5     | 471-6    |                                      |
| Soto et. al.            | 2001 | Plasmodium vivax clinically resistant to chloroquine in Colombia                                                                                                  | The American journal of tropical medicine and hygiene                                                                  | 65     | 2     | 90-3     | Primaquine given at end of follow up |
| Taylor et. al.          | 2001 | Chloroquine/doxycycline combination versus chloroquine alone, and doxycycline alone for the treatment of Plasmodium falciparum and Plasmodium vivax malaria in    | The American journal of tropical medicine and hygiene                                                                  | 64     | 5-Jun | 223-8    | Primaquine given at end of follow up |
| Valecha et. al.         | 2001 | Comparative antirelapse efficacy of CDRI compound 80/53 (Bulaquine) vs primaquine in double blind clinical trial                                                  | Current Science                                                                                                        | 80     |       | 561-563  | Details same as Adak-2001            |
| Lacy et. al.            | 2002 | Atovaquone/proguanil therapy for Plasmodium falciparum and Plasmodium vivax malaria in Indonesians who lack clinical immunity                                     | Clinical infectious diseases : an official publication of the Infectious Diseases Society of America                   | 35     | 9     | e92-5    |                                      |
| Congpuong et. al.       | 2002 | Sensitivity of Plasmodium vivax to chloroquine in Sa Kaeo Province, Thailand                                                                                      | Acta tropica                                                                                                           | 83     | 2     | 117-21   |                                      |
| Hamedt et. al.          | 2002 | Plasmodium vivax malaria in Southeast Iran in 1999-2001: establishing the response to chloroquine in vitro and in vivo                                            | The Southeast Asian journal of tropical medicine and public health                                                     | 33     | 3     | 512-8    |                                      |
| Yadav et. al.           | 2002 | Radical curative efficacy of five-day regimen of primaquine for treatment of Plasmodium vivax malaria in India                                                    | The Journal of parasitology                                                                                            | 88     | 5     | 1042-4   |                                      |
| Da Silva et. al.        | 2003 | Short course schemes for vivax malaria treatment                                                                                                                  | Revista da Sociedade Brasileira de Medicina Tropical                                                                   | 36     | 2     | 235-9    |                                      |
| Fernandopulle et. al.   | 2003 | Efficacy of a five-day course of primaquine in preventing relapses in Plasmodium vivax malaria--a pilot study                                                     | The Ceylon medical journal                                                                                             | 48     | 1     | 32       |                                      |
| Machado et. al.         | 2003 | Correlation between Plasmodium vivax variants in Belem, Para State, Brazil and symptoms and clearance of parasitaemia                                             | The Brazilian journal of infectious diseases : an official publication of the Brazilian Society of Infectious Diseases | 7      | 3     | 175-7    |                                      |
| Rajgor et. al.          | 2003 | Efficacy of a 14-day primaquine regimen in preventing relapses in patients with Plasmodium vivax malaria in Mumbai, India                                         | Transactions of the Royal Society of Tropical Medicine and Hygiene                                                     | 97     | 4     | 438-40   |                                      |
| Silachamroon et. al.    | 2003 | Clinical trial of oral artesunate with or without high-dose primaquine for the treatment of vivax malaria in Thailand                                             | The American journal of tropical medicine and hygiene                                                                  | 69     | 1     | 14-Aug   |                                      |
| Valibayov et. al.       | 2003 | Clinical efficacy of chloroquine followed by primaquine for Plasmodium vivax treatment in Azerbaijan                                                              | Acta tropica                                                                                                           | 88     | 1     | 99-102   |                                      |
| Walsh et. al.           | 2004 | Randomized trial of 3-dose regimens of tafenoquine (WR238605) versus low-dose primaquine for preventing Plasmodium vivax malaria relapse                          | Clinical infectious diseases : an official publication of the Infectious Diseases Society of America                   | 39     | 8     | 1095-103 |                                      |
| Hamedt et. al.          | 2004 | Therapeutic efficacy of artesunate in Plasmodium vivax malaria in Thailand                                                                                        | The Southeast Asian journal of tropical medicine and public health                                                     | 35     | 3     | 570-4    |                                      |
| Leslie et. al.          | 2004 | Compliance with 14-day primaquine therapy for radical cure of vivax malaria--a randomized placebo-controlled trial comparing unsupervised with supervised         | Transactions of the Royal Society of Tropical Medicine and Hygiene                                                     | 98     | 3     | 168-73   |                                      |
| Vijaykadga et. al.      | 2004 | Assessment of therapeutic efficacy of chloroquine for vivax malaria in Thailand                                                                                   | The Southeast Asian journal of tropical medicine and public health                                                     | 35     | 3     | 566-9    | Primaquine given at end of follow up |
| Dunne et. al.           | 2005 | A double-blind, randomized study of azithromycin compared to chloroquine for the treatment of Plasmodium vivax malaria in India                                   | The American journal of tropical medicine and hygiene                                                                  | 73     | 6     | 1108-11  |                                      |
| Yeramian et. al.        | 2005 | Efficacy of DB289 in Thai patients with Plasmodium vivax or acute, uncomplicated Plasmodium falciparum infections                                                 | The Journal of infectious diseases                                                                                     | 192    | 2     | 319-22   |                                      |
| Alvarez et. al.         | 2006 | Efficacy of three chloroquine-primaquine regimens for treatment of Plasmodium vivax malaria in Colombia                                                           | The American journal of tropical medicine and hygiene                                                                  | 75     | 4     | 605-9    |                                      |
| Carmona-Fonseca et. al. | 2006 | Plasmodium vivax malaria: treatment of primary attacks with primaquine, in three different doses, and a fixed dose of chloroquine, Antioquia, Colombia, 2003-2004 | Biomedica : revista del Instituto Nacional de Salud                                                                    | 26     | 3     | 353-65   | Details same as Ref No. 93           |
| Haghdoost et. al.       | 2006 | Estimating the relapse risk of Plasmodium vivax in Iran under national chemotherapy scheme using a novel method                                                   | Journal of vector borne diseases                                                                                       | 43     | 4     | 168-72   |                                      |
| Krudsood et. al.        | 2006 | Safety and tolerability of elubiquine (bulaquine, CDRI 80/53) for treatment of Plasmodium vivax malaria in Thailand                                               | The Korean journal of parasitology                                                                                     | 44     | 3     | 221-8    |                                      |

### Additional File 3: Study References

| Authors                 | Year | Title                                                                                                                                                              | Journal                                                                                              | Volume | Issue | Pages    | Reason for Exclusion                 |
|-------------------------|------|--------------------------------------------------------------------------------------------------------------------------------------------------------------------|------------------------------------------------------------------------------------------------------|--------|-------|----------|--------------------------------------|
| Maguire et. al.         | 2006 | Mefloquine is highly efficacious against chloroquine-resistant Plasmodium vivax malaria and Plasmodium falciparum malaria in Papua, Indonesia                      | Clinical infectious diseases : an official publication of the Infectious Diseases Society of America | 42     | 8     | 1067-72  |                                      |
| Tasanor et. al.         | 2006 | Clinical-parasitological response and in-vitro sensitivity of Plasmodium vivax to chloroquine and quinine on the western border of Thailand                        | Transactions of the Royal Society of Tropical Medicine and Hygiene                                   | 100    | 5     | 410-8    |                                      |
| Dao et. al.             | 2007 | Vivax malaria: preliminary observations following a shorter course of treatment with artesunate plus primaquine                                                    | Transactions of the Royal Society of Tropical Medicine and Hygiene                                   | 101    | 6     | 534-9    |                                      |
| Hasugian et. al.        | 2007 | Dihydroartemisinin-piperazine versus artesunate-amodiaquine: superior efficacy and posttreatment prophylaxis against multidrug-resistant Plasmodium falciparum and | Clinical infectious diseases : an official publication of the Infectious Diseases Society of America | 44     | 8     | 1067-74  | Primaquine given at end of follow up |
| Krudsood et. al.        | 2007 | Clinical efficacy of chloroquine versus artemether-lumefantrine for Plasmodium vivax treatment in Thailand                                                         | The Korean journal of parasitology                                                                   | 45     | 2     | 111-4    |                                      |
| Elmes et. al.           | 2008 | The efficacy and tolerability of three different regimens of tafenoquine versus primaquine for post-exposure prophylaxis of Plasmodium vivax malaria in the        | Transactions of the Royal Society of Tropical Medicine and Hygiene                                   | 102    | 11    | 1095-101 | Post Exposure Prophylaxis            |
| Krudsood et. al.        | 2008 | High-dose primaquine regimens against relapse of Plasmodium vivax malaria                                                                                          | The American journal of tropical medicine and hygiene                                                | 78     | 5     | 736-40   |                                      |
| Leslie et. al.          | 2008 | A randomised trial of an eight-week, once weekly primaquine regimen to prevent relapse of plasmodium vivax in Northwest Frontier Province, Pakistan                | PloS one                                                                                             | 3      | 8     | e2861    |                                      |
| Carmona-Fonseca et. al. | 2009 | Prevention of Plasmodium vivax malaria recurrence: efficacy of the standard total dose of primaquine administered over 3 days                                      | Acta tropica                                                                                         | 112    | 2     | 188-92   |                                      |
| Lee et. al.             | 2009 | Biological resistance of hydroxychloroquine for Plasmodium vivax malaria in the Republic of Korea                                                                  | The American journal of tropical medicine and hygiene                                                | 81     | 4     | 600-4    |                                      |
| Moon et. al.            | 2009 | Recurrence rate of vivax malaria in the Republic of Korea                                                                                                          | Transactions of the Royal Society of Tropical Medicine and Hygiene                                   | 103    | 12    | 1245-9   |                                      |
| Orjuela-Sanchez et. al. | 2009 | Recurrent parasitemias and population dynamics of Plasmodium vivax polymorphisms in rural Amazonia                                                                 | The American journal of tropical medicine and hygiene                                                | 81     | 6     | 961-8    |                                      |
| Carmona-Fonseca et. al. | 2010 | Vivax malaria in children: Recurrences with standard total dose of primaquine administered in 3 vs. 7 days                                                         | IATREIA                                                                                              | 23     | 1     | 10--20   | No translation available             |
| Pukrittayakamee et. al. | 2010 | A comparison of two short-course primaquine regimens for the treatment and radical cure of Plasmodium vivax malaria in Thailand                                    | The American journal of tropical medicine and hygiene                                                | 82     | 4     | 542-7    |                                      |
| Takeuchi et. al.        | 2010 | Directly-observed therapy (DOT) for the radical 14-day primaquine treatment of Plasmodium vivax malaria on the Thai-Myanmar border                                 | Malaria journal                                                                                      | 9      |       | 308      |                                      |
| Yeshiwondim et. al.     | 2010 | Therapeutic efficacy of chloroquine and chloroquine plus primaquine for the treatment of Plasmodium vivax in Ethiopia                                              | Acta tropica                                                                                         | 113    | 2     | 105-13   |                                      |
| Maneeboonyang et. al.   | 2011 | Directly observed therapy with primaquine to reduce the recurrence rate of plasmodium vivax infection along the Thai-Myanmar border                                | The Southeast Asian journal of tropical medicine and public health                                   | 42     | 1     | Sep-18   |                                      |
| Muhamed et. al.         | 2011 | Monitoring of clinical efficacy and in vitro sensitivity of Plasmodium vivax to chloroquine in area along Thai Myanmar border during 2009-2010                     | Malar J                                                                                              | 10     |       | 44       |                                      |
| Poravuth et. al.        | 2011 | Pyronaridine-artesunate versus chloroquine in patients with acute Plasmodium vivax malaria: a randomized, double-blind, non-inferiority trial                      | PloS one                                                                                             | 6      | 1     | e14501   | Primaquine given at end of follow up |
