# Supplementary material for: Primaquine radical cure of Plasmodium vivax: a critical review of the literature
Source: PubMed Central journal article supplement (PMC3489597; doi:10.1186/1475-2875-11-280), 2012-08-17
Supplement: 1475-2875-11-280-S9.pdf [file 1475-2875-11-280-S9.pdf]

### Additional File 9: Severe Adverse Events

| First Author | Year of Publication | Sample Size | Co-administered Drug | Primaquine Supervision | Duration of Treatment (days) | Total Primaquine Dose (mg/kg) | Day of Adverse Event | Adverse Event Reported                         | No. of Patients | Action Taken      |
|--------------|---------------------|-------------|----------------------|------------------------|------------------------------|-------------------------------|----------------------|------------------------------------------------|-----------------|-------------------|
| Cooper       | 1953                | 34          | Quinine              | Not stated             | 14                           | 4.67                          | Not Stated           | Cyanosis                                       | 2               | None              |
| Fisher       | 1970                | 133         | Chloroquine          | All doses              | 14                           | 3.5                           | Not Stated           | Haemolysis (G6PDd)                             | 1               | None              |
| Clyde        | 1977                | 11          | Chloroquine          | All doses              | 7                            | 7                             | 4                    | Severe abdominal cramps, vomiting and cyanosis | 1               | Treatment stopped |
| Silachamroon | 2003                | 157         | Artesunate           | Not stated             | 14                           | 7                             | 4                    | 13% reduction in haematocrit (G6PDd)           | 1               | Treatment stopped |
| Silachamroon | 2003                | 157         | Artesunate           | Not stated             | 14                           | 7                             | 6                    | 14% and 8% reduction in haematocrit (G6PDd)    | 2               | Treatment stopped |
| Silachamroon | 2003                | 157         | Artesunate           | Not stated             | 14                           | 7                             | 7                    | 16% reduction in haematocrit (G6PDd)           | 1               | Treatment stopped |
| Dunne        | 2005                | 97          | Chloroquine          | Not stated             | 14                           | Not Stated                    | Not Stated           | Maculopapular rash                             | 1               | Treatment stopped |
| Dunne        | 2005                | 97          | Chloroquine          | Not stated             | 14                           | Not Stated                    | Not Stated           | Severe pruritis                                | 1               | Treatment stopped |
